1 Foliar pathogens are unlikely to stabilize coexistence of competing species in a California  
2 grassland

3 Erin R. Spear\* and Erin A. Mordecai\*\*†

4 \*Biology Department, Stanford University, Stanford, CA 94305

5 †Corresponding author: [emordeca@stanford.edu](mailto:emordeca@stanford.edu)

6

7 **Abstract**

8 Pathogen infection is common in wild plants and animals, and may regulate their populations. If  
9 pathogens have narrow host ranges and increase with the density of their favored hosts, they may  
10 promote host species diversity by suppressing common species to the benefit of rare species. Yet,  
11 because many pathogens infect multiple co-occurring hosts, they may not strongly respond to the  
12 relative abundance of a single host species. Are natural communities dominated by specialized  
13 pathogens that respond to the relative abundance of a specific host or by pathogens with broad  
14 host ranges and limited responses to the relative abundance of single host? The answer  
15 determines the potential for pathogens to promote host coexistence, as often hypothesized, or to  
16 have negligible or even negative effects on host coexistence. We lack a systematic understanding  
17 of the impacts, identities, and host ranges of pathogens in natural communities. Here we  
18 characterize a community of foliar fungal pathogens and evaluate their host specificity and  
19 fitness impacts in a California grassland community of native and exotic species. We found that  
20 most of the commonly isolated fungal pathogens were multi-host, with intermediate to low  
21 specialization. The amount of pathogen damage each host experienced was independent of host  
22 species local relative abundance. Despite pathogen sharing among the host species, fungal  
23 communities slightly differed in composition across host species. Plants with high pathogen

24 damage tended to have lower seed production but the relationship was weak, suggesting limited  
25 fitness impacts. Moreover, seed production was not dependent on the local relative abundance of  
26 each plant species, suggesting that stabilizing coexistence mechanisms may operate at larger  
27 spatial scales in this community. Because foliar pathogens in this grassland community are  
28 multi-host and have small fitness impacts, they are unlikely to promote negative frequency-  
29 dependence or plant species coexistence in this system. Still, given that pathogen community  
30 composition differentiates across host species, some more subtle feedbacks between host relative  
31 abundance and pathogen community composition, damage, and fitness impacts are possible,  
32 which could in turn promote either coexistence or competitive exclusion.

### 33 **Introduction**

34 Pathogens are ubiquitous in ecological communities (Burdon 1993, Gilbert 2002,  
35 Lafferty et al. 2008). Because they affect host demographic rates, pathogens are often expected  
36 to regulate host species population growth (Burdon 1982, Burdon and Chilvers 1982). Most  
37 pathogens infect only a subset of the available host species, so their incidence, and by extension  
38 their impacts, may be host-specific (Gilbert and Webb 2007, Beckstead et al. 2014, Parker et al.  
39 2015). Host-specific population regulation can promote species coexistence by suppressing  
40 species when they become common and providing a relative advantage to rare species (Fig. 1).  
41 This pathogen-mediated negative frequency-dependence, sometimes called the Janzen-Connell  
42 hypothesis (Janzen 1970, Connell 1971), has growing support in diverse plant communities,  
43 including tropical forests (Augspurger 1983, Augspurger and Kelly 1984, Gilbert 2005, Bagchi  
44 et al. 2010, Bever et al. 2015), temperate forests (Packer and Clay 2000), and temperate  
45 grasslands (Petermann et al. 2008).

46 At the same time, fungal pathogens of plants in natural systems often infect multiple  
47 hosts (Gilbert and Webb 2007, Kluger et al. 2008, Hersh et al. 2012, Spear 2017). In diverse  
48 plant communities, where the nearest neighbors may be heterospecifics, selection should favor  
49 multi-host pathogens (May 1991). Thus, we hypothesize that most plant pathogens are relatively  
50 host generalized (Spear et al. 2015, Spear 2017) and, by extension, that their attack rates and  
51 impacts do not respond to the relative abundance of a single host species. If this is the case, then,  
52 in contrast to the Janzen-Connell hypothesis, many pathogens may play little role in maintaining  
53 local host diversity and may even promote competitive exclusion or spatial turnover of species  
54 (Mordecai 2011, Spear et al. 2015). Few studies have assessed whether these alternatives to  
55 pathogen-mediated stabilization occur in nature (but see Mordecai 2013).

56 For pathogens to generate negative frequency-dependence and stabilize coexistence, they  
57 must: (1) disproportionately damage relatively common hosts, such that the amount or severity  
58 of damage depends on host relative abundance; and (2) reduce host population growth (Fig. 1).  
59 Condition (1) may occur either because (A) individual pathogen species are relatively specialized  
60 or exhibit host preference, (B) communities of multi-host pathogen species are differentially  
61 structured by plant species, or (C) multi-host pathogens exert host-specific impacts. In this paper,  
62 we measure frequency-dependent damage, host specificity, and impacts on population growth for  
63 foliar pathogens that infect co-occurring native and exotic grasses in a California grassland.  
64 Specifically, across six common grass species we: (i) quantified pathogen damage and linked it  
65 to plant species relative abundance; (ii) surveyed fungal community composition and pathogen  
66 sharing across host species; and (iii) measured the response of per-capita seed output to pathogen  
67 damage and plant relative abundance.

68

## 69 **Methods**

### 70 *Study site & focal grass species*

71 We conducted the study in grasslands in Jasper Ridge Biological Preserve (JRBP) at  
72 Stanford University, a 485-ha site in San Mateo County, CA (37°24'N, 122°13'30"W; 66 - 207  
73 m), in 2015. JRBP has a Mediterranean climate, with cool (mean 9.2°C), wet winters and warm  
74 (mean 20.1°C), dry summers (total annual precipitation ~ 622.5 mm) (Ackerly et al. 2002). Plant  
75 growth begins with the onset of winter rains and plants senesce at the onset of summer.

76 We assessed the identities and impacts of foliar fungal pathogens on six common grass  
77 species: three exotic annuals, *Avena barbata*, *Bromus hordeaceus*, and *Bromus diandrus*; one  
78 exotic perennial, *Phalaris aquatica*; and two native perennials, *Stipa pulchra* and *Elymus*

79 *glaucus*. To obtain a broader description of fungal diversity and host associations, we also  
80 isolated fungi from, but did not assess damage on, the common exotic grass species *A. fatua*,  
81 *Brachypodium distachyon*, and *Festuca perennis*. The exotic grasses were introduced to  
82 California in the mid-19<sup>th</sup> century (Corbin and D'Antonio 2004).

83 We assessed the relationships between pathogen damage and host relative abundance  
84 (Condition 1), plant seed production and pathogen damage (Condition 2), and pathogen  
85 specialization and community composition (Conditions 1A-C).

86

### 87 *Impacts of plant species relative abundance on pathogen damage (Condition 1)*

88 To measure pathogen burden across host species relative abundance (Condition 1), we  
89 visually measured the percentage of leaf area damaged by fungal pathogens (hereafter, pathogen  
90 damage) for the six focal grass species across 10 transects (yellow points in Fig. S1) that were  
91 established in areas where perennial species (either *S. pulchra*, *E. glaucus*, or *P. aquatica*) range  
92 from rare to common in a given 1-m<sup>2</sup> plot; hereafter referred to as 'perennial density transects'.  
93 As possible, we sampled multiple plants per transect and up to six haphazardly-selected leaves  
94 per plant, calculating average pathogen damage on each plant. To measure variation in pathogen  
95 damage within the growing season, we censused damage in these plots from March 11-16, 2015  
96 (444 marked grass individuals) and from April 17-20, 2015 (163 of the marked grasses).

97 We tested whether pathogen damage correlated with host relative abundance in the plot  
98 (Condition 1) while controlling for other potential predictors: plant species, sampling month, and  
99 sampling structure (plot nested in transect as random effects), using normally-distributed errors  
100 (lmer function in the lme4 package; Bates et al. 2014). We assessed the most important  
101 predictors of pathogen damage by comparing the Akaike Information Criterion (AIC) values of

102 models with all or a subset of the fixed effects of sampling month \* species and species \*  
103 frequency. We also modeled pathogen damage as a function of the dominant species at the plot  
104 scale as a categorical variable, but found no significant effect.

105

#### 106 *Isolating foliar fungal pathogens (Conditions 1A-B)*

107 To estimate fungal pathogen community composition and host ranges (Conditions 1A-B)  
108 at a preserve-wide scale, we cultured fungi from grasses along 24 transects that spanned a range  
109 of plant community composition, geographic location, and soil types (10 perennial density  
110 transects and 14 additional transects; Fig. S1 yellow and red points, respectively). Three of the  
111 pathogen survey transects ran through plots in the Jasper Ridge Global Change Experiment  
112 (GCE) (Zhu et al. 2016), where we sampled in ambient and water addition plots (water addition  
113 had no impact on fungal community composition). From March 19 – May 4, 2015, we collected  
114 and cultured from a symptomatic leaf from 772 grass individuals. We identified fungi (as  
115 described below) from 61 of the 444 marked plants from the damage survey and 219 additional  
116 plants. Sampling intensity varied among the nine grass species and transects based on availability  
117 of each species; the percentage of tissue pieces with growth varied among the hosts (Tables S1-  
118 S2). We excised tissue (< 2 mm<sup>2</sup>) from the advancing disease margin, surface-sterilized it in 70%  
119 EtOH followed by 10% household (Clorox) bleach (60 s each), then plated it on malt extract agar  
120 with 2% chloramphenicol (2% MEA). We pressed six of the segments onto 2% MEA to verify  
121 effectiveness of the surface sterilization; we observed no growth. We isolated morphologically  
122 distinct hyphae into pure culture on 2% MEA within 30 days. The Mordecai lab maintains  
123 reference strains (California Department of Food and Agriculture permit 3160).

124

125 *Identifying fungal species by DNA sequencing (Conditions 1A-B)*

126 For each isolate, we extracted genomic DNA from fungal mycelium using REExtract-  
127 N-Amp Tissue PCR Kit (Sigma-Aldrich, Inc.), following the manufacturer's protocol. We  
128 amplified and sequenced the internal transcribed spacers (ITS) 1 and 2 and the 5.8S nuclear  
129 ribosomal gene using the primer pairs ITS-1F and ITS-4 (Gardes and Bruns 1993). For PCR  
130 amplification, we used a T100 thermal cycler (Bio-Rad Laboratories, Inc., Hercules, CA) and  
131 thermal cycling conditions following U'Ren et al. (2010). Following electrophoresis on a 1.5%  
132 agarose gel, we visualized PCR products using GelRed™ (Biotium Inc., Hayward, CA) and sent  
133 to them MCLAB (San Francisco, CA) for cleanup and bidirectional sequencing on an ABI 3730  
134 XL sequencer.

135 We estimated the taxonomic relationships among the fungi in two ways. First, we  
136 assigned operational taxonomic units (OTUs) by manually editing all reads, automatically  
137 assembling bidirectional reads into consensus sequences using a minimum of 20% overlap and  
138 85% sequence similarity, and clustering the 288 consensus sequences and two unidirectional  
139 sequences based on a minimum of 40% overlap and 90, 95, 97 and 99% sequence similarity  
140 using Sequencher (Gene Codes, Ann Arbor, MI). Second, because sequence similarity for the  
141 ITS region varies across fungal species (O'Brien et al. 2005), we built phylogenetic trees for  
142 groups of OTUs with similar sequences (1-52 isolates per dataset) (as described in Higginbotham  
143 et al. 2014, Spear 2017). Because not all sequences mapped onto named fungal species, we  
144 assigned each operational species a unique species code (Table S3). We treated isolates  
145 belonging to a species complex as a single species. All sequence data will be submitted to  
146 GenBank (accession numbers XXXX-XXXX).

147

148 *Analyses of fungal community composition and host associations (Conditions 1A-B)*

149 To describe the fungal community ( $N = 290$  isolates), we calculated (i) sampling efficacy  
150 using taxon accumulation curves, (ii) observed taxon richness, (iii) estimated lower bound of true  
151 richness, accounting for unseen taxa and correcting for under-sampling in highly diverse  
152 assemblages, with the iChao1 estimator (Chiu et al. 2014), (iv) rank-abundance distribution, and  
153 (v) diversity of taxa with Fisher's alpha, which is robust to unequal sample sizes (Fisher et al.  
154 1943, Magurran 2013) and the effective number of species (Jost 2006). We defined fungal  
155 species isolated ten or more times as abundant. We then contrasted fungal community  
156 composition across five grass species (Conditions 1A-B) using permutational multivariate  
157 analyses of variance (PERMANOVAs; Anderson 2001), with the `adonis` and  
158 `pairwise.perm.manova` functions (Oksanen et al. 2016, Hervé 2017). We visualized the  
159 differences using non-metric multidimensional scaling (NMDS). For these analyses ( $N = 99$   
160 isolates), we: (i) considered each grass species-by-perennial density transect combination to be a  
161 distinct community, excluding those communities with fewer than three isolates and *B.*  
162 *hordeaceus*, which only had one community with the three or more isolates; and (ii) created a  
163 matrix of pairwise community dissimilarities using the function `vegdist` with the Chao method,  
164 which is abundance-based and adjusted to consider unseen species (Chao et al. 2005, Oksanen et  
165 al. 2016). Finally, we made pairwise comparisons of the pathogen communities of the nine  
166 sampled grass species based on the observed number of shared species and using the Morisita-  
167 Horn index ( $N = 290$  isolates, 200 bootstrap replicates).

168 To assess the specialization of the non-singleton fungal species ( $N = 228$  isolates)  
169 (Condition 1A), we calculated the weighted specialization index  $d'$ , the degree to which a species  
170 deviates from random host associations, adjusted for the preserve-wide relative abundance of the



171 hosts *A. barbata*, *B. diandrus*, *B. hordeaceus*, *S. pulchra*, and *E. glaucus* (see R code for data)  
172 (Blüthgen et al. 2006, Dormann et al. 2016). We classified the  $d'$  values as low (0-0.33),  
173 moderate (0.34-0.67), and high (0.68-1) specialization (Blüthgen et al. 2006, Dormann et al.  
174 2016).

175 All pathogen community analyses were conducted in *R* version 3.4.2, using the packages  
176 RVAideMemoire (Hervé 2017), vegan (Oksanen et al. 2016), SpadeR (Chao et al. 2016),  
177 bipartite (Dormann et al. 2016), fossil (Vavrek 2011), BiodiversityR (Kindt and Coe 2005), rich  
178 (Rossi 2011) and with custom commands (Gardener 2014).

179

#### 180 *Pathogenicity tests (Conditions 1A-B)*

181 We verified the pathogenicity of the fungal isolates by experimentally inoculating 99  
182 isolates, representing 35 fungal species, onto the host species from which they were originally  
183 isolated (Table S4). In a greenhouse, we secured colonized or uncolonized (for paired controls)  
184 2% ME agar plugs to healthy leaves using Parafilm (Sinclair and Dhingra 1995). We censused  
185 leaves for symptoms within one week, and compared the proportion of diseased leaves for each  
186 isolate to its paired control using bias-reduced generalized linear models (brglm function;  
187 Kosmidis 2013), with binomial errors and probit link functions (Table S4).

188

#### 189 *Impacts of pathogen damage on per-capita seed production (Condition 1C, 2)*

190 To assess the relationship between fecundity, community composition, and pathogen  
191 burden, we harvested seeds from 350 of the 444 grass individuals from which we had surveyed  
192 pathogen damage in the perennial density transects. We measured per-capita seed production,  
193 density of all host species, and pathogen damage for all focal species except *P. aquatica*, which

194 occurs in monotypic stands with little variation in relative abundance. We standardized per-  
195 capita seed output and pathogen damage in either March or April by species using z-scores, and  
196 regressed pathogen damage on seed output (models with unstandardized variables produced  
197 similar results). We built separate models for pathogen damage in March versus April because  
198 they used the same individuals with a single seed output. Because variance in seed production  
199 differed across damage levels, we used quantile regression on the 25<sup>th</sup>, 50<sup>th</sup>, and 75<sup>th</sup> percentiles  
200 of seed production (rq function, Koenker 2017). Finally, we linked fungal genera to pathogen  
201 damage in March and/or April ( $N = 65$  isolates) and seed output ( $N = 56$  isolates) (Condition 1C;  
202 we did not have enough samples to assess damage and seed output by fungal species). More  
203 comprehensively assessing fitness impacts would require measuring demographic rates on  
204 experimentally infected plants.

205 All pathogen damage and seed production statistical analyses were performed in *R*  
206 version 3.2.3 (R Development Core Team 2014) using the packages *plyr* (Wickham 2011),  
207 *reshape* (Wickham 2007), *plotrix* (Lemon 2006), *ggplot2* (Wickham 2009), *quantreg* (Koenker  
208 2017), *lmerTest* (Kuznetsova et al. 2016), *lqmm* (Geraci 2016), *lme4* (Bates et al. 2014),  
209 *piecewiseSEM* (Lefcheck 2016), and *lsmeans* (Lenth and Love 2017).

210

## 211 **Results**

### 212 *Pathogen damage across host species and relative abundance (Condition 1)*

213 Focal species relative abundance was not significantly related to pathogen damage,  
214 counter to Condition 1 (Figs. 1 and 2). Instead, the strongest predictors of pathogen damage were  
215 host species and sampling month (Tables S5-S6). *A. barbata* and *B. hordeaceus* had the highest

216 pathogen damage (Table S5). Pathogen damage was higher in April than in March (Fig. S2;  
217 paired two-tailed  $t$ -tests: mean difference = 0.0265,  $t = -4.1019$ ,  $df = 162$ ,  $p = 6.47 \times 10^{-5}$ ).

218

### 219 *Fungal pathogen identities and diversity*

220 We observed a diverse fungal community (Fig. S3). We cultivated 302 isolates (290  
221 successfully sequenced) from 772 symptomatic leaves from nine plant species (Table S1).

222 Considering 90 - 99% sequence similarity, the isolates represented 27 – 48 operational  
223 taxonomic units (OTUs), respectively (Fisher's alpha index for diversity: 7.28 - 16.39).

224 Hereafter, we designate all fungal species taxonomic affiliations based on the phylogenetic  
225 analyses. The fungal isolates represented 41 fungal species (iChao1 estimated species richness:  
226 285.78, 95% CI = 85.91, 1375.24; Fisher's alpha for diversity: 13.03, 95% CI = 8.91, 18.58;  
227 effective number of species = 18.29, 95% CI = 15.45, 21.14). Most fungal species were rare  
228 (56% were singletons or doubletons) and few were abundant (22% isolated >10 times) (Fig. S4).

229 *Pyrenophora*, *Ramularia*, *Alternaria*, and *Parastagonospora* were the most common genera  
230 (Fig. 3 and Table S3). We experimentally confirmed the pathogenicity of 27% of the 99 isolates  
231 tested, representing eight of the nine common fungal species (Fig 3; Tables S3-S4).

232

### 233 *Fungal pathogen host associations and community similarity (Conditions 1A-B)*

234 Most fungi were isolated from multiple hosts, counter to Condition 1A that fungal species  
235 are host-specific: 74% of the 19 non-singleton fungal species infected multiple hosts, averaging  
236 four host species (Fig. 3). Two fungi, *Pyrenophora lolii* (A2) and *Alternaria infectoria* species-  
237 group (C1), were isolated from seven of the nine grass species (Fig. 3). Concordantly, most non-  
238 singleton fungal species had low to moderate specificity ( $d'$  median = 0.346; Table S7). An

239 exception with high specificity ( $d' = 0.924$ ) was *Pyrenophora tritici-repentis* (E), which was  
240 isolated 20/21 times from *E. glaucus* and once from an *S. pulchra* individual in an *E. glaucus*-  
241 dominated plot; it comprised 61% of the 33 fungal isolates from *E. glaucus* leaves (Fig. 3; Table  
242 S7; Condition 1A). Two additional likely specialists were only isolated from the under-sampled  
243 grass species *P. aquatica* ( $N = 18$  isolates): *Pyrenophora* cf. *dactylidis* (L) and  
244 *Parastagonospora caricis* (AM), comprising 39% of that host's isolates (Fig. 3; Condition 1A).

245 The eight best-sampled grasses species shared one to eight fungal species with other  
246 grass species (median = 3; Table S8; Fig. 3). The average estimated pairwise similarity between  
247 host species was moderate (42%; min = 5% for *E. glaucus* – *P. aquatica*; max = 100% for *F.*  
248 *perennis* – *S. pulchra* and *A. barbata* – *A. fatua*; Table S8). By contrast, two grass species had  
249 low estimated fungal community similarity with other species: *E. glaucus* (5% – 11%), and *P.*  
250 *aquatica* (5% – 70%; Table S8; Fig. 3). Despite extensive pathogen sharing, the fungal pathogen  
251 communities of five of the focal grass species were significantly different, supporting Condition  
252 1B that communities of shared pathogens are structured by host species ( $N = 99$  isolates,  
253 PERMANOVA:  $F_{4,15} = 3.682$ ,  $R^2 = 0.495$ ,  $p = 0.001$ ; Fig. 4).

#### 255 *Relationship between pathogen damage and per-capita seed output (Condition 2)*

256 The relationships between pathogen damage and seed production were generally  
257 negative but highly variable, providing only weak support for Condition 2 that pathogens impact  
258 host fitness (Fig. 5a-b). Quantile regression showed that increasing pathogen damage in April  
259 was associated with reduced seed output at the 50<sup>th</sup> percentile (i.e., for average-output  
260 individuals), but had no significant relationship for the 25<sup>th</sup> or 75<sup>th</sup> percentiles (i.e., for high- and  
261 low-output individuals) (Table S9; Fig. 5b). Contrary to expectations for negative frequency-

262 dependence at local scales, focal species frequency had no association with either seed output  
263 (Fig. 5d) or pathogen damage (Fig. 2).

264 Particular fungal pathogen genera were not significantly associated with higher damage  
265 in April or lower seed production (Condition 1C), based on z-scores across host species ( $N = 65$   
266 individuals: 13 *A. barbata*, 8 *B. diandrus*, 17 *E. glaucus*, 22 *S. pulchra*, and 5 *P. aquatica*; Fig.  
267 S5). Small sample sizes precluded testing for host-specific impacts of all observed fungal  
268 species. Anecdotally, a single *S. pulchra* infected with *Sordaria* sp. (a singleton) had high  
269 pathogen damage and low seed production, consistent with a large pathogen impact.

270

## 271 **Discussion**

### 272 *Limited potential for pathogen-mediated coexistence*

273 Although pathogens are often hypothesized to promote plant species coexistence by  
274 generating negative frequency dependence (Gillett 1962, Augspurger 1983, Packer and Clay  
275 2000, Petermann et al. 2008, Allan et al. 2010, Mangan et al. 2010, Bagchi et al. 2014, Bever et  
276 al. 2015, Whitaker et al. 2017), diverse natural communities should favor multi-host pathogens,  
277 decoupling pathogen abundance from the density of individual host species (May 1991, Spear et  
278 al. 2015). The degree of pathogen specialization and their role in promoting frequency  
279 dependence remains unresolved (Mordecai 2011). In a California grassland, we found ubiquitous  
280 pathogen damage: most plants and 57% of all surveyed leaves had pathogen damage. Yet the  
281 observed pathogen damage had no relationship with host relative abundance (contrary to  
282 Condition 1 for pathogens to cause negative frequency dependence; Fig. 1). Moreover, foliar  
283 pathogen damage was only weakly associated with lower seed production (Fig. 5a-b), providing  
284 limited support for pathogen impacts on plant fitness (Condition 2 in Fig. 1). While pathogens

285 could also affect the outcome of competition by altering fitness differences between species,  
286 observational data (Fig. 5a-b) and preliminary experiments (Mordecai et al., unpublished) do not  
287 support strong, differential fitness impacts of foliar pathogen infection in this system.

288         The lack of a relationship between pathogen damage and host relative abundance (Fig. 2)  
289 is unsurprising given the extensive pathogen sharing among grass species (Table S8; Fig. 3; in  
290 contrast to Condition 1A in Fig. 1). Many pathogens are specific to a genus or family (Gilbert  
291 and Webb 2007, Barrett et al. 2009); thus, for the study grasses (all Poaceae), pathogen damage  
292 should be decoupled from the relative abundance of a single host species. It is also possible that  
293 pathogen damage responds to host relative abundance at the regional, rather than local, scale  
294 (Mitchell et al. 2002).

295         Despite pathogen sharing (Table S8; Fig. 3), fungal community composition subtly  
296 varied across grass species, partially supporting Condition 1B that pathogen communities differ  
297 across host species (Figs. 1, 3-4). In particular, the recently invading perennial grass *P. aquatica*  
298 (“Oakmead Herbarium: Arrivals, Weeds | Jasper Ridge Biological Preserve” 2018) had low  
299 pathogen damage and a distinct pathogen community, including two fungi with strong host  
300 affinities: *Pyrenophora cf. dactylidis* (L) and *Parastagonospora caricis* (AM). Moreover, several  
301 common fungi were relatively specialized (partially supporting Condition 1A [Fig. 1] that  
302 pathogens are host-specific), including *Pyrenophora tritici-repentis* (E) which was almost  
303 exclusively isolated from the native perennial *E. glaucus*. With limited sample sizes for each  
304 pathogen – host pair, we were unable to measure host-specific impacts of shared pathogens  
305 (Condition 1C) conclusively. In sum, although the multi-host fungal pathogens that dominate this  
306 California grassland community varied in their host affinities (Condition 1A), and pathogen

307 communities were partially structured by host species (Condition 1B), neither mechanism was  
308 strong enough to generate frequency-dependent pathogen damage (Condition 1).

309 Our study focused on culturable fungi, which may be disproportionately host generalist,  
310 and on foliar pathogens, which may exert smaller fitness impacts than seedling damping off  
311 pathogens, root pathogens, and pathogens that castrate plants (Gilbert 2002). Those pathogens  
312 that impact different life stages and/or tissue types may shape the outcome of competition  
313 between plant species. A fuller assessment would require measuring fitness effects across life  
314 stages in experimental infections and incorporating them into population growth models.

315 The broad host ranges and limited fitness impacts of pathogens in this system contrast  
316 sharply with pathogen impacts on closely-related cultivated cereals such as barley, wheat, and  
317 oats. The fungal pathogen species we encountered are congeners of important cereal pathogens,  
318 including *Pyrenophora*, *Parastagonospora*, and *Ramularia* spp., which cause major yield losses  
319 and often specialize on host genotypes (Havis et al. 2015, McDonald and Stukenbrock 2016).  
320 Our results imply that naturally occurring host genetic and species diversity may mitigate the  
321 spread of highly virulent pathogens in wild grassland systems (McDonald and Stukenbrock  
322 2016). Foliar pathogen load has declined with increased plant community diversity in natural  
323 grassland and old-field systems (Mitchell et al. 2002, Rottstock et al. 2014). Further, broad host  
324 ranges and minimal host impacts are well suited to pathogen persistence and spread in seasonal,  
325 mixed species grasslands like our California grassland site. Particularly in annual-dominated  
326 stands, pathogens must recolonize and spread during the limited winter and spring growing  
327 season each year, giving a selective advantage to multi-host pathogens.

328

329 *Conclusions*

330           In one of the first studies to directly measure pathogen-mediated frequency-dependence  
331 and connect it to pathogen community composition, we showed that, contrary to prevailing  
332 hypotheses in other plant systems, foliar fungal pathogens are unlikely to promote plant  
333 coexistence in an invaded California grassland. Much of the evidence that pathogens maintain  
334 plant community diversity is based on spatial and temporal patterns of conspecific negative  
335 density-dependent mortality (e.g., Packer and Clay 2000, Klironomos 2002, Bell et al. 2006,  
336 Petermann et al. 2008, Bagchi et al. 2010, Mangan et al. 2010, Comita et al. 2010), with limited  
337 examination of fungal identity and host affinity (but see Parker and Gilbert 2007, Gilbert and  
338 Webb 2007, Hersh et al. 2012, Schweizer et al. 2013, Spear 2017). By contrast, our work  
339 suggests that pathogens have limited impacts on the outcome of competition when the burden is  
340 frequency-independent and fitness costs are minimal, which may commonly occur in natural  
341 systems.

#### 342 **Acknowledgements**

343 We appreciate help from Reuben Brandt, Joe Sertich, Johannah Farner, Fletcher Halliday, Bill  
344 Gomez, Meredith McClintock, Kabir Peay, Nora Dunkirk, Ryan Tabibi, Divya Ramani, Caroline  
345 Daws, Nona Chiariello, Philippe Cohen, Cary Tronson, and Steve Gomez, and funding from the  
346 Jasper Ridge Kennedy Endowment and the National Science Foundation (DEB-1518681).

347



348 **References**

- 349 Ackerly, D., C. Knight, S. Weiss, K. Barton, and K. Starmer. 2002. Leaf size, specific leaf area  
350 and microhabitat distribution of chaparral woody plants: contrasting patterns in species  
351 level and community level analyses. *Oecologia* 130:449–457.
- 352 Allan, E., J. van Ruijven, and M. J. Crawley. 2010. Foliar fungal pathogens and grassland  
353 biodiversity. *Ecology* 91:2572–2582.
- 354 Augspurger, C. K. 1983. Seed dispersal of the tropical tree, *Platypodium elegans*, and the escape  
355 of its seedlings from fungal pathogens. *The Journal of Ecology* 71:759–771.
- 356 Augspurger, C. K., and C. K. Kelly. 1984. Pathogen mortality of tropical tree seedlings:  
357 experimental studies of the effects of dispersal distance, seedling density, and light  
358 conditions. *Oecologia* 61:211–217.
- 359 Bagchi, R., R. E. Gallery, S. Gripenberg, S. J. Gurr, L. Narayan, C. E. Addis, R. P. Freckleton,  
360 and O. T. Lewis. 2014. Pathogens and insect herbivores drive rainforest plant diversity  
361 and composition. *Nature* 506:85–88.
- 362 Bagchi, R., T. Swinfield, R. E. Gallery, O. T. Lewis, S. Gripenberg, L. Narayan, and R. P.  
363 Freckleton. 2010. Testing the Janzen-Connell mechanism: pathogens cause  
364 overcompensating density dependence in a tropical tree. *Ecology Letters* 13:1262–1269.
- 365 Barrett, L. G., J. M. Kniskern, N. Bodenhausen, W. Zhang, and J. Bergelson. 2009. Continua of  
366 specificity and virulence in plant host–pathogen interactions: causes and consequences.  
367 *New Phytologist* 183:513–529.
- 368 Bates, D., M. Maechler, B. Bolker, and S. Walker. 2014. lme4: Linear mixed-effects models  
369 using Eigen and S4.

- 370 Beckstead, J., S. E. Meyer, K. O. Reinhart, K. M. Bergen, S. R. Holden, and H. F. Boekweg.  
371 2014. Factors affecting host range in a generalist seed pathogen of semi-arid shrublands.  
372 *Plant Ecology* 215:427–440.
- 373 Bell, T., R. P. Freckleton, and O. T. Lewis. 2006. Plant pathogens drive density-dependent  
374 seedling mortality in a tropical tree. *Ecology Letters* 9:569–574.
- 375 Bever, J. D., S. A. Mangan, and H. M. Alexander. 2015. Maintenance of plant species diversity  
376 by pathogens. *Annual Review of Ecology, Evolution, and Systematics* 46:305–325.
- 377 Blüthgen, N., F. Menzel, and N. Blüthgen. 2006. Measuring specialization in species interaction  
378 networks. *BMC Ecology* 6:9.
- 379 Burdon, J. 1993. The structure of pathogen populations in natural plant communities. *Annual*  
380 *Review of Phytopathology* 31:305–323.
- 381 Burdon, J., and G. Chilvers. 1982. Host density as a factor in plant disease ecology. *Annual*  
382 *Review of Phytopathology* 20:143–166.
- 383 Burdon, J. J. 1982. The effect of fungal pathogens on plant communities. *The plant community*  
384 *as a working mechanism*:99–112.
- 385 Chao, A., R. L. Chazdon, R. K. Colwell, and T. J. Shen. 2005. A new statistical approach for  
386 assessing similarity of species composition with incidence and abundance data. *Ecology*  
387 *Letters* 8:148–159.
- 388 Chao, A., K. H. Ma, T. C. Hsieh, and C.-H. Chiu. 2016. SpadeR: Species prediction and  
389 diversity estimation with R.
- 390 Chiu, C.-H., Y.-T. Wang, B. A. Walther, and A. Chao. 2014. An improved nonparametric lower  
391 bound of species richness via a modified good–turing frequency formula. *Biometrics*  
392 70:671–682.

- 393 Comita, L. S., H. C. Muller-Landau, S. Aguilar, and S. P. Hubbell. 2010. Asymmetric Density  
394 Dependence Shapes Species Abundances in a Tropical Tree Community. *Science*  
395 329:330–332.
- 396 Connell, J. H. 1971. On the role of natural enemies in preventing competitive exclusion in some  
397 marine animals and in rain forest trees. *Dynamics of populations*:298–312.
- 398 Corbin, J. D., and C. M. D’Antonio. 2004. Competition between native perennial and exotic  
399 annual grasses: Implications for an historical invasion. *Ecology* 85:1273–1283.
- 400 Dormann, C. F., J. Fruend, and B. Gruber. 2016. *bipartite: Visualising Bipartite Networks and*  
401 *Calculating Some (Ecological) Indices*.
- 402 Fisher, R. A., A. S. Corbet, and C. B. Williams. 1943. The Relation Between the Number of  
403 Species and the Number of Individuals in a Random Sample of an Animal Population.  
404 *Journal of Animal Ecology* 12:42–58.
- 405 Gardener, M. 2014. *Community Ecology: Analytical Methods Using R and Excel*. Pelagic  
406 Publishing Ltd.
- 407 Gardes, M., and T. D. Bruns. 1993. ITS primers with enhanced specificity for basidiomycetes -  
408 application to the identification of mycorrhizae and rusts. *Molecular Ecology* 2:113–118.
- 409 Geraci, M. 2016. *lqmm: Linear Quantile Mixed Models*.
- 410 Gilbert, G. S. 2002. Evolutionary ecology of plant diseases in natural ecosystems. *Annual*  
411 *Review of Phytopathology* 40:13–43.
- 412 Gilbert, G. S. 2005. Biotic interactions in the tropics: their role in the maintenance of species  
413 diversity. Pages 141–164 *Dimensions of plant disease in tropical forests*.
- 414 Gilbert, G. S., and C. O. Webb. 2007. Phylogenetic signal in plant pathogen–host range.  
415 *Proceedings of the National Academy of Sciences* 104:4979–4983.

- 416 Gillett, J. B. 1962. Pest pressure, an underestimated factor in evolution. Systematics Association  
417 Publication 4:37–46.
- 418 Havis, N. D., J. K. M. Brown, G. Clemente, P. Frei, M. Jedryczka, J. Kaczmarek, M. Kaczmarek,  
419 P. Matusinsky, G. R. D. McGrann, S. Pereyra, M. Piotrowska, H. Sghyer, A. Tellier, and  
420 M. Hess. 2015. *Ramularia collo-cygni*—An Emerging Pathogen of Barley Crops.  
421 *Phytopathology* 105:895–904.
- 422 Hersh, M. H., R. Vilgalys, and J. S. Clark. 2012. Evaluating the impacts of multiple generalist  
423 fungal pathogens on temperate tree seedling survival. *Ecology* 93:511–520.
- 424 Hervé, M. 2017. RVAideMemoire: Testing and Plotting Procedures for Biostatistics.
- 425 Higginbotham, S., W. R. Wong, R. G. Linington, C. Spadafora, L. Iturrado, and A. E. Arnold.  
426 2014. Sloth Hair as a Novel Source of Fungi with Potent Anti-Parasitic, Anti-Cancer and  
427 Anti-Bacterial Bioactivity. *PLOS ONE* 9:e84549.
- 428 Janzen, D. H. 1970. Herbivores and the number of tree species in tropical forests. *The American*  
429 *Naturalist* 104:501–528.
- 430 Jost, L. 2006. Entropy and diversity. *Oikos* 113:363–375.
- 431 Kindt, R., and R. Coe. 2005. BiodiversityR. Tree diversity analysis. A manual and software for  
432 common statistical methods for ecological and biodiversity studies. World Agroforestry  
433 Centre (ICRAF), Nairobi.
- 434 Klironomos, J. N. 2002. Feedback with soil biota contributes to plant rarity and invasiveness in  
435 communities. *Nature* 417:67–70.
- 436 Kluger, C. G., J. W. Dalling, R. E. Gallery, E. Sanchez, C. Weeks-Galindo, and A. E. Arnold.  
437 2008. Host generalists dominate fungal communities associated with seeds of four  
438 neotropical pioneer species. *Journal of Tropical Ecology* 24:351–354.

- 439 Koenker, R. 2017. *quantreg: Quantile Regression*. R, Vienna.
- 440 Kosmidis, I. 2013. *brglm: Bias reduction in binomial-response Generalized Linear Models*.
- 441 Kuznetsova, A., P. B. Brockhoff, and R. H. B. Christensen. 2016. *lmerTest: Tests in Linear*  
442 *Mixed Effects Models*.
- 443 Lafferty, K. D., S. Allesina, M. Arim, C. J. Briggs, G. De Leo, A. P. Dobson, J. A. Dunne, P. T.  
444 J. Johnson, A. M. Kuris, D. J. Marcogliese, N. D. Martinez, J. Memmott, P. A. Marquet,  
445 J. P. McLaughlin, E. A. Mordecai, M. Pascual, R. Poulin, and D. W. Thieltges. 2008.  
446 *Parasites in food webs: the ultimate missing links*. *Ecology Letters* 11:533–546.
- 447 Lefcheck, J. 2016. *piecewiseSEM: Piecewise Structural Equation Modeling*.
- 448 Lemon, J. 2006. *Plotrix: a package in the red light district of R*. *R-News* 6:8–12.
- 449 Lenth, R., and J. Love. 2017. *lsmeans: Least-Squares Means*.
- 450 Magurran, A. E. 2013. *Measuring Biological Diversity*. John Wiley & Sons.
- 451 Mangan, S. A., S. A. Schnitzer, E. A. Herre, K. M. L. Mack, M. C. Valencia, E. I. Sanchez, and  
452 J. D. Bever. 2010. *Negative plant-soil feedback predicts tree-species relative abundance*  
453 *in a tropical forest*. *Nature* 466:752–755.
- 454 May, R. M. 1991. *A fondness for fungi*. *Nature* 352:475–476.
- 455 McDonald, B. A., and E. H. Stukenbrock. 2016. *Rapid emergence of pathogens in agro-*  
456 *ecosystems: global threats to agricultural sustainability and food security*. *Phil. Trans. R.*  
457 *Soc. B* 371:20160026.
- 458 Mitchell, C. E., D. Tilman, and J. V. Groth. 2002. *Effects of grassland plant species diversity,*  
459 *abundance, and composition on foliar fungal disease*. *Ecology* 83:1713–1726.
- 460 Mordecai, E. A. 2011. *Pathogen impacts on plant communities: unifying theory, concepts, and*  
461 *empirical work*. *Ecological Monographs* 81:429–441.

- 462 Mordecai, E. A. 2013. Despite spillover, a shared pathogen promotes native plant persistence in  
463 a cheatgrass-invaded grassland. *Ecology* 94:2744–2753.
- 464 Oakmead Herbarium: Arrivals, Weeds | Jasper Ridge Biological Preserve. 2018, March 5. .  
465 <http://jrpbp.stanford.edu/content/oakmead-herbarium-arrivals-weeds#Arrival>.
- 466 O’Brien, H. E., J. L. Parrent, J. A. Jackson, J.-M. Moncalvo, and R. Vilgalys. 2005. Fungal  
467 Community Analysis by Large-Scale Sequencing of Environmental Samples. *Applied  
468 and Environmental Microbiology* 71:5544–5550.
- 469 Oksanen, J., R. Kindt, P. Legendre, and B. O’Hara. 2016. *vegan: Community Ecology Package*.
- 470 Packer, A., and K. Clay. 2000. Soil pathogens and spatial patterns of seedling mortality in a  
471 temperate tree. *Nature* 404:278–281.
- 472 Parker, I. M., and G. S. Gilbert. 2007. When there is no escape: the effects of natural enemies on  
473 native, invasive, and noninvasive plants. *Ecology* 88:1210–1224.
- 474 Parker, I. M., M. Saunders, M. Bontrager, A. P. Weitz, R. Hendricks, R. Magarey, K. Suiter, and  
475 G. S. Gilbert. 2015. Phylogenetic structure and host abundance drive disease pressure in  
476 communities. *Nature* 520:542–544.
- 477 Petermann, J. S., A. J. F. Fergus, L. A. Turnbull, and B. Schmid. 2008. Janzen-Connell effects  
478 are widespread and strong enough to maintain diversity in grasslands. *Ecology* 89:2399–  
479 2406.
- 480 R Development Core Team. 2014. *R: A Language and Environment for Statistical Computing*. R  
481 Foundation for Statistical Computing, Vienna, Austria.
- 482 Rossi, J.-P. 2011. rich: an R package to analyse species richness. *Diversity* 3:112–120.

- 483 Rottstock, T., J. Joshi, V. Kummer, and M. Fischer. 2014. Higher plant diversity promotes higher  
484 diversity of fungal pathogens, while it decreases pathogen infection per plant. *Ecology*  
485 95:1907–1917.
- 486 Schweizer, D., G. S. Gilbert, and K. D. Holl. 2013. Phylogenetic ecology applied to enrichment  
487 planting of tropical native tree species. *Forest Ecology and Management* 297:57–66.
- 488 Sinclair, J. B., and O. D. Dhingra. 1995. *Basic Plant Pathology Methods*. CRC Press, Boca  
489 Raton, FL.
- 490 Spear, E. R. 2017. Phylogenetic relationships and spatial distributions of putative fungal  
491 pathogens of seedlings across a rainfall gradient in Panama. *Fungal Ecology* 26:65–73.
- 492 Spear, E. R., P. D. Coley, and T. A. Kursar. 2015. Do pathogens limit the distributions of tropical  
493 trees across a rainfall gradient? *Journal of Ecology* 103:165–174.
- 494 U'Ren, J. M., F. Lutzoni, J. Miadlikowska, and A. E. Arnold. 2010. Community Analysis  
495 Reveals Close Affinities Between Endophytic and Endolichenic Fungi in Mosses and  
496 Lichens. *Microbial Ecology* 60:340–353.
- 497 Vavrek, M. J. 2011. fossil: palaeoecological and palaeogeographical analysis tools.  
498 *Palaeontologia Electronica* 14:1T.
- 499 Whitaker, B. K., J. T. Bauer, J. D. Bever, and K. Clay. 2017. Negative plant-phyllosphere  
500 feedbacks in native Asteraceae hosts – a novel extension of the plant-soil feedback  
501 framework. *Ecology Letters* in press:n/a-n/a.
- 502 Wickham, H. 2007. Reshaping data with the reshape package. *Journal of Statistical Software* 21.
- 503 Wickham, H. 2009. *ggplot2: Elegant Graphics for Data Analysis*. Springer-Verlag, New York.
- 504 Wickham, H. 2011. The split-apply-combine strategy for data analysis. *Journal of Statistical*  
505 *Software* 40:1–29.

506 Zhu, K., N. R. Chiariello, T. Tobeck, T. Fukami, and C. B. Field. 2016. Nonlinear, interacting  
507 responses to climate limit grassland production under global change. Proceedings of the  
508 National Academy of Sciences 113:10589–10594.  
509



510 **Figure Captions**

511 **Figure 1.** Pathogen-mediated frequency-dependence requires that: (1) pathogen damage increase  
512 with host species relative abundance, via mechanisms A-C, and (2) pathogen damage reduces  
513 fitness. The resulting decline in per-capita population growth rates with relative abundance can  
514 stabilize plant species coexistence.

515 **Figure 2.** Relationship between focal species frequency in the plot and pathogen damage in  
516 March, for six focal species. Marginal  $R^2 < 0.02$  for all species.

517 **Figure 3.** Bipartite network of 41 fungal pathogen species (right;  $N = 290$  isolates) isolated from  
518 nine grass species (left), with widths proportional to isolation frequency. Fungal specificity (d') is  
519 indicated for 17 common species (L = low, M = moderate, H = high). Experimentally confirmed  
520 pathogenicity is indicated with an asterisk.

521 **Figure 4.** Dissimilarity of fungal pathogen community composition ( $N = 99$  isolates, 21 fungal  
522 species) among five grass species (stress = 0.101). Data points represent fungal community  
523 composition across grass species-by-transect combinations, with 95% confidence ellipses around  
524 the centroid of each grass species. The fungal community of: (i) *S. pulchra* (SP) was  
525 significantly different from those of *A. barbata* (AB) ( $p_{adj} = 0.037$ ), *B. diandrus* (BD) ( $p_{adj} =$   
526  $0.037$ ), *E. glaucus* (EG) ( $p_{adj} = 0.04$ ), and *P. aquatica* (PA) ( $p_{adj} = 0.037$ ); (ii) PA was  
527 significantly different from that of BD ( $p_{adj} = 0.05$ ); and (iii) BD was significantly different from  
528 that of AB ( $p_{adj} = 0.05$ ).

529 **Figure 5.** Pathogen damage in March versus seed production (a), pathogen damage in April  
530 versus seed production (b), pathogen damage in March versus April (c), and species frequency  
531 versus seed production (d). All values are expressed as z-scores calculated by species. Marginal  
532  $R^2 < 0.03$  for all plotted relationships.

533 **Figure 1**

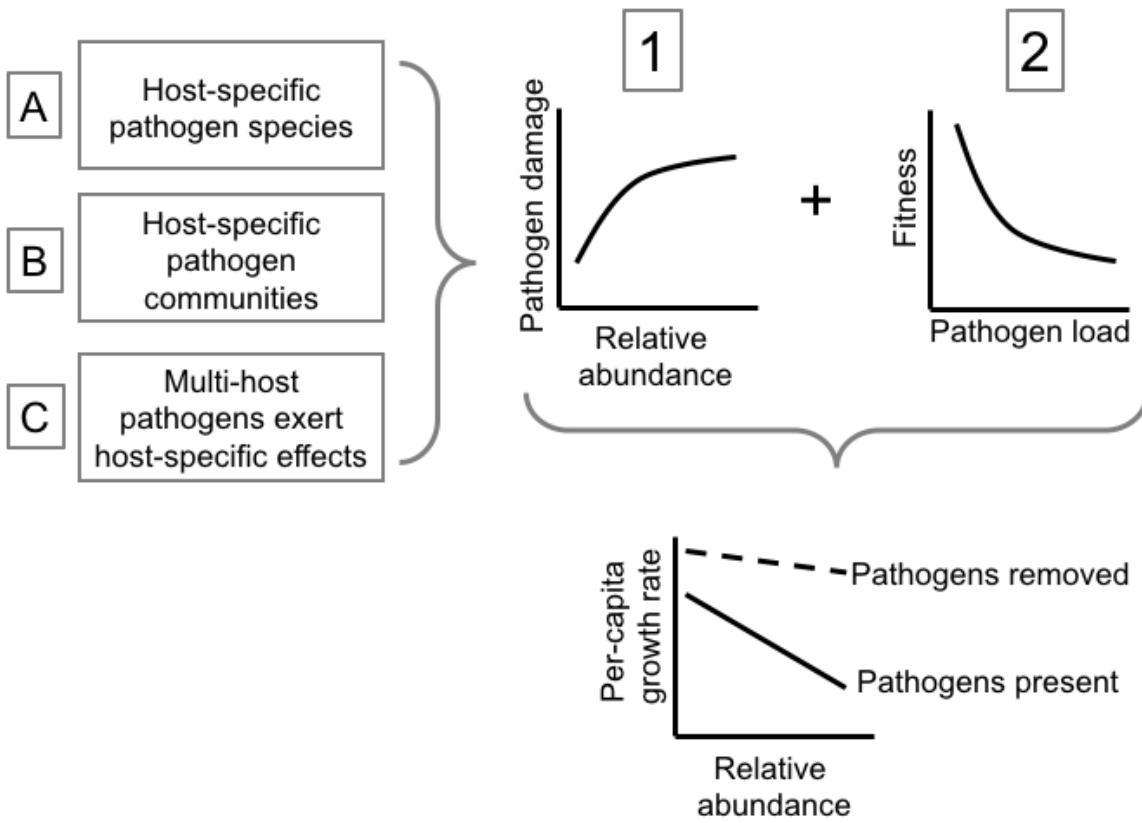

534

535

536 **Figure 2**

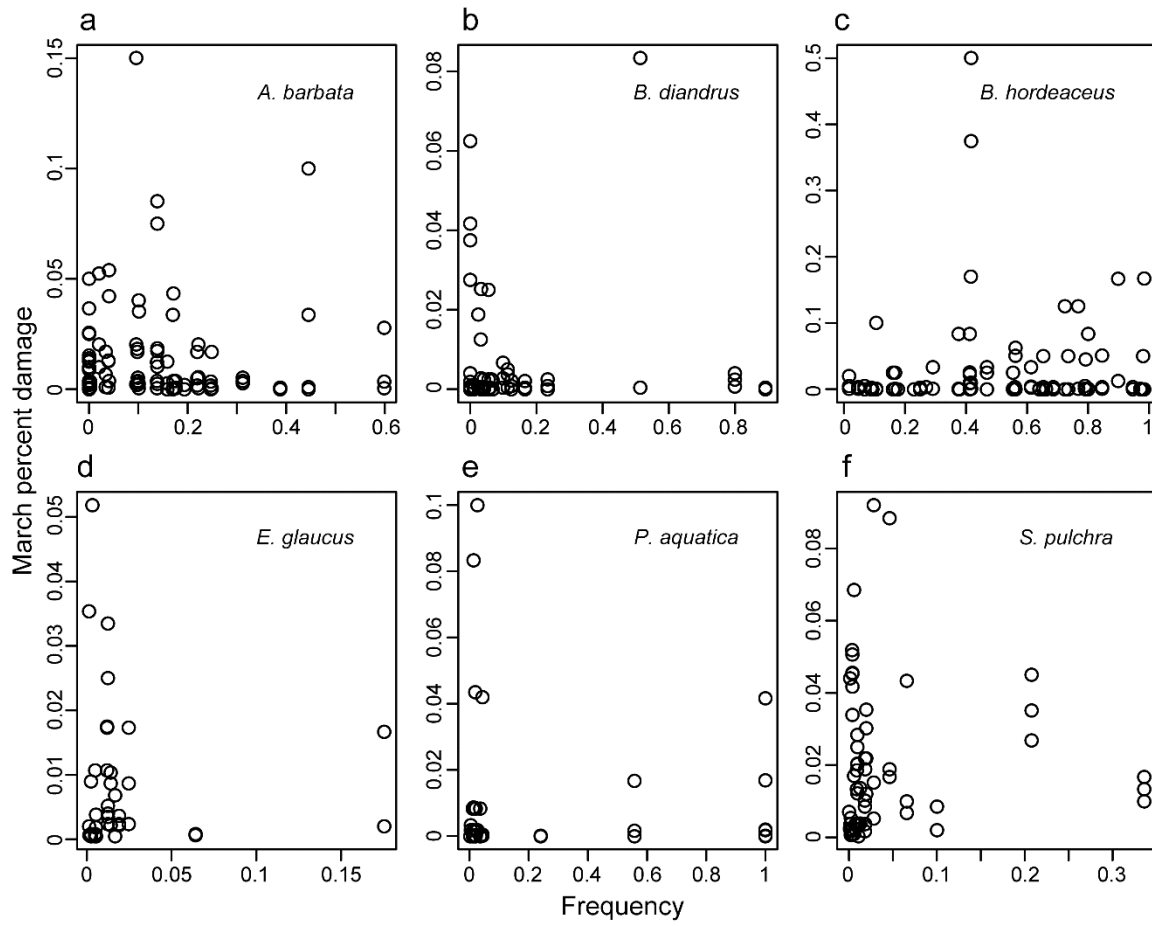

537

538

539 **Figure 3**

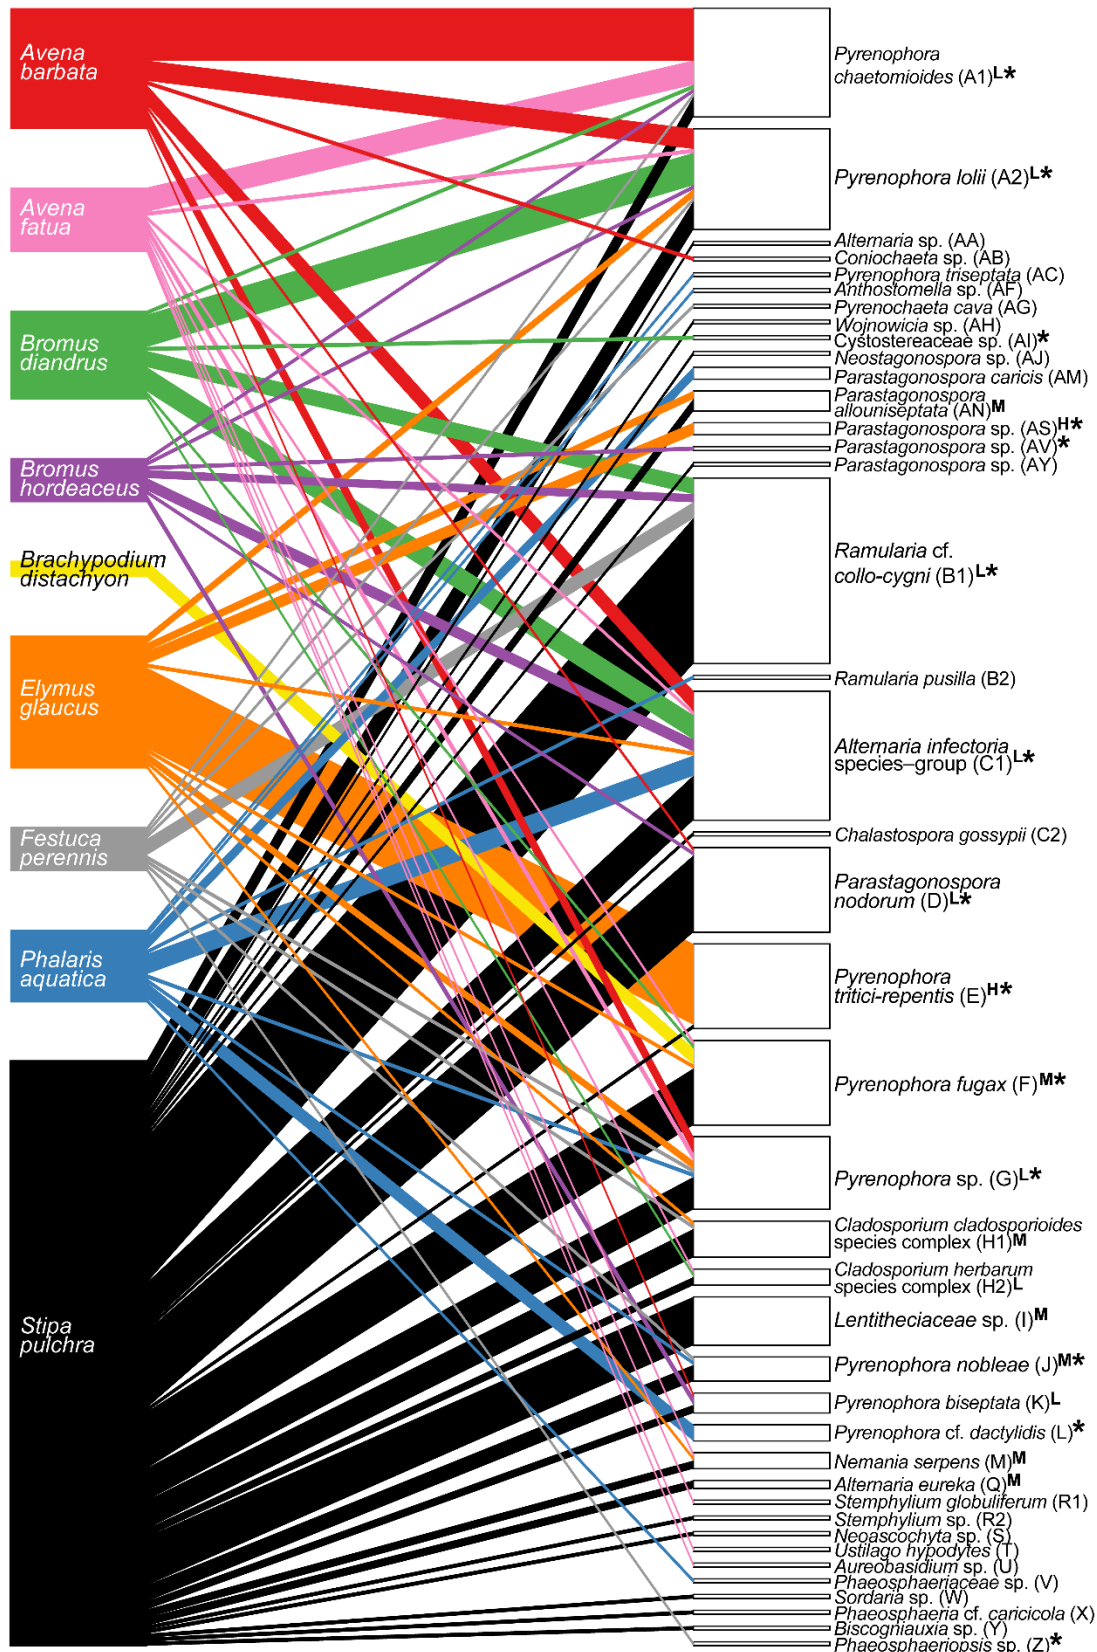

540

541 **Figure 4**

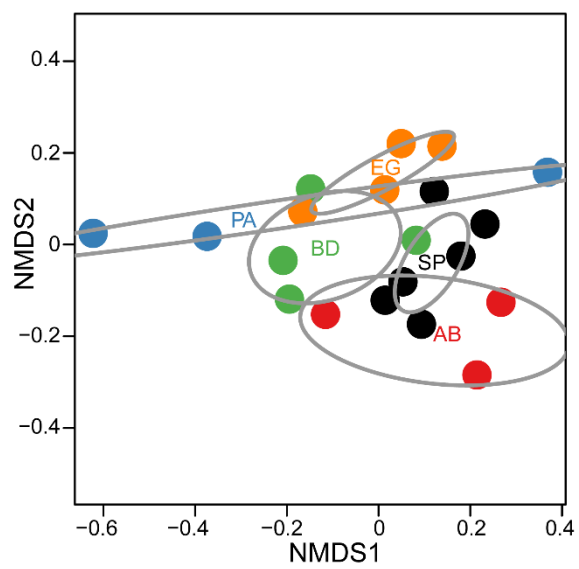

542

543

544 **Figure 5**

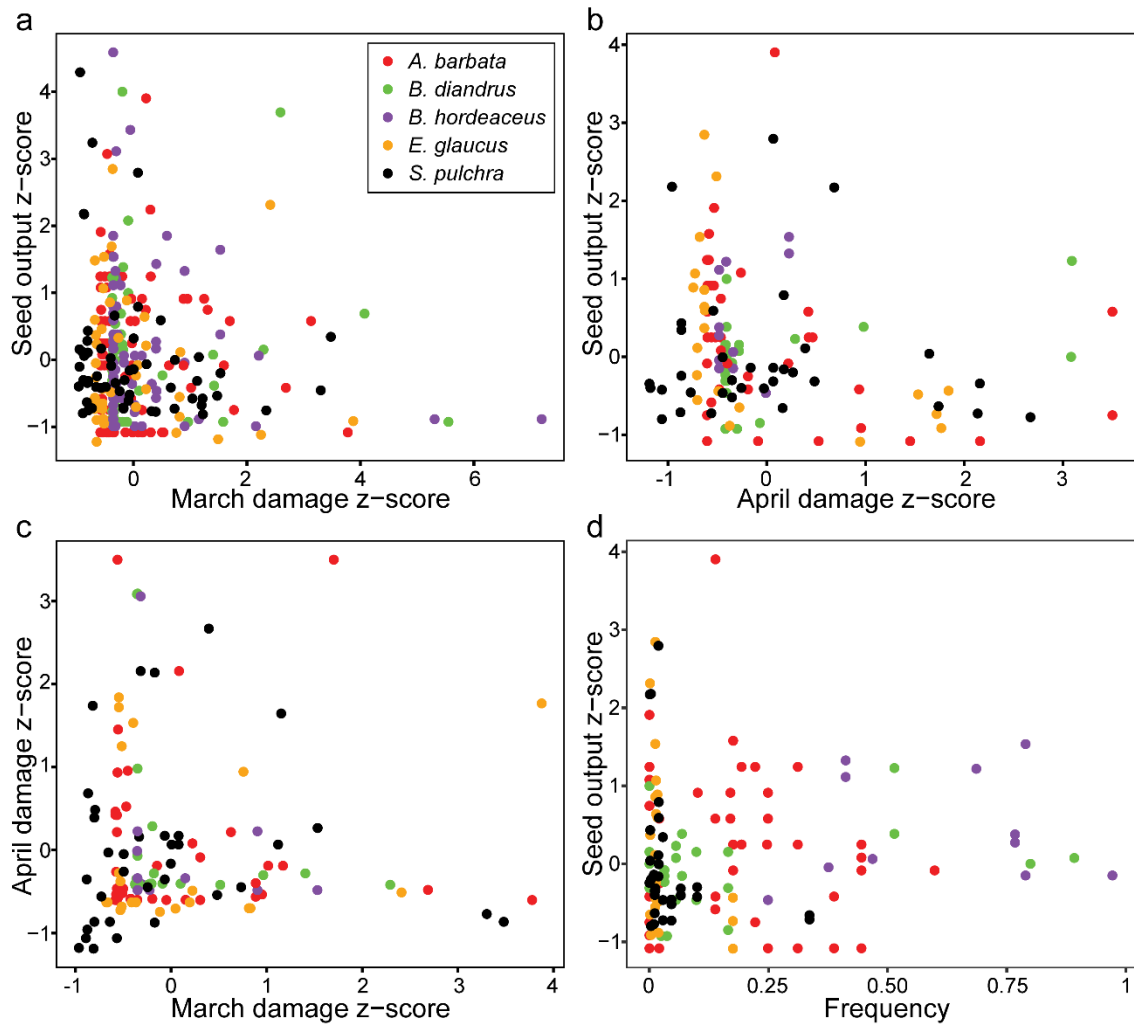

545

546
